# Supplementary material for: Global proteomics of Ubqln2-based murine models of ALS
Source: PubMed Central journal article supplement (PMC7873701; doi:10.1074/jbc.ra120.015960), 2020-12-10
Supplement: mmc2.pdf [file mmc2.pdf]

| <b>TMT</b> | <b>Experiment</b> | <b>Ubqln2</b>      | <b>Tissue</b>      | <b>Age (months)</b> | <b>Sex</b> | <b>MS Run ID</b> | <b>MS Instrument</b> |
|------------|-------------------|--------------------|--------------------|---------------------|------------|------------------|----------------------|
| <b>1</b>   | KO Old Brain      | KO                 | Brain              | 12-16               | Male       | m07953-62        | Obitrap Fusion       |
| <b>2</b>   | KO Young Brain    | KO                 | Brain              | 5-6                 | Male       | a01805-16        | Obitrap Lumos        |
| <b>3</b>   | KO Lumb SpC       | KO                 | Lumbar Spinal Cord | 5-6                 | Male       | a01833-44        | Obitrap Lumos        |
| <b>4</b>   | KO Hippo          | KO                 | Hippocampus        | 4-4.5               | Male       | m11795-806       | Obitrap Fusion       |
| <b>5</b>   | KI Hippo          | KI                 | Hippocampus        | 4-5                 | Male       | m09995-10006     | Obitrap Fusion       |
| <b>6</b>   | KI SpC            | KI                 | Spinal Cord        | 4-5                 | Male       | m10008-19        | Obitrap Fusion       |
| <b>7</b>   | Tg Hippo          | WT-hTg and Mut-hTg | Hippocampus        | 2                   | 8M 1F      | m14899-10        | Obitrap Fusion       |
| <b>8</b>   | Tg Lumb SpC       | WT-hTg and Mut-hTg | Lumbar Spinal Cord | 2                   | 8M 1F      | m14925-36        | Obitrap Fusion       |

**TMT\_1: *Ubqln2* KO Old Brain:**

| <b>TMT label</b> | <b>Animal ID</b> | <b>Sample</b> | <b>Sex</b> | <b>Neuromotor testing age (days)</b> | <b>Neuromotor testing weight (g)</b> | <b>Tissue harvest age (days)</b> | <b><i>Ubqln2</i></b> |
|------------------|------------------|---------------|------------|--------------------------------------|--------------------------------------|----------------------------------|----------------------|
| 126              | 5114-461         | WT_1          | M          | 314                                  | 31.5                                 | 365                              | wt/y                 |
| 127N             | 5114-460         | WT_2          | M          | 314                                  | 37                                   | 365                              | wt/y                 |
| 127C             | 5114-463         | WT_3          | M          | 314                                  | 37.4                                 | 365                              | wt/y                 |
| 128N             | 5114-394         | WT_4          | M          | 448                                  | 33.4                                 | 497                              | wt/y                 |
| 128C             | 5114-395         | WT_5          | M          | 448                                  | 32.4                                 | 497                              | wt/y                 |
| 129N             | 5114-449         | KO_1          | M          | 321                                  | 35.1                                 | 370                              | ko/y                 |
| 129C             | 5114-445         | KO_2          | M          | 321                                  | 37.5                                 | 370                              | ko/y                 |
| 130N             | 5114-446         | KO_3          | M          | 321                                  | 32.6                                 | 370                              | ko/y                 |
| 130C             | 5114-385         | KO_4          | M          | 448                                  | 31.3                                 | 497                              | ko/y                 |
| 131              | 5114-388         | KO_5          | M          | 448                                  | 31                                   | 497                              | ko/y                 |

**TMT\_2\_and\_3: *Ubqln2* KO Young (Brain and Lumbar Spinal Cord):**

| <b>TMT label</b> | <b>Animal ID</b> | <b>Sample</b> | <b>Sex</b> | <b>Neuromotor testing age (days)</b> | <b>Neuromotor testing weight (g)</b> | <b>Tissue harvest age (days)</b> | <b><i>Ubqln2</i></b> |
|------------------|------------------|---------------|------------|--------------------------------------|--------------------------------------|----------------------------------|----------------------|
| 126              | 5114-728         | WT_1          | M          | 137                                  | 28                                   | 143                              | wt/y                 |
| 127N             | 5114-738         | WT_2          | M          | 137                                  | 30.5                                 | 143                              | wt/y                 |
| 127C             | 5114-741         | WT_3          | M          | 137                                  | 29.8                                 | 143                              | wt/y                 |
| 128N             | 5114-743         | WT_4          | M          | 137                                  | 31.3                                 | 143                              | wt/y                 |
| 128C             | 5114-712         | KO_1          | M          | 170                                  | 26.6                                 | 176                              | ko/y                 |
| 129N             | 5114-718         | KO_2          | M          | 165                                  | 26                                   | 171                              | ko/y                 |
| 129C             | 5114-731         | KO_3          | M          | 137                                  | 31.5                                 | 143                              | ko/y                 |
| 130N             | 5114-732         | KO_4          | M          | 137                                  | 27.9                                 | 143                              | ko/y                 |
| 130C             | 5114-737         | KO_5          | M          | 137                                  | 30.1                                 | 143                              | ko/y                 |
| 131              | 5114-742         | KO_6          | M          | 137                                  | 31.8                                 | 143                              | ko/y                 |

**TMT\_4: *Ubqln2* KO Hippocampus:**

| <b>TMT Label</b> | <b>Animal ID</b> | <b>Sample</b> | <b>Sex</b> | <b>Age (days)</b> | <b><i>Ubqln2</i></b> | <b>Hippocampus</b> |
|------------------|------------------|---------------|------------|-------------------|----------------------|--------------------|
| 126              | 5114-919         | WT_1          | M          | 106               | wt/y                 | Right              |
| 127N             | 5114-918         | WT_2          | M          | 106               | wt/y                 | Right              |
| 127C             | 5114-877         | WT_3          | M          | 131               | wt/y                 | Right              |
| 128N             | 5114-922         | KO_1          | M          | 106               | ko/y                 | Right              |
| 128C             | 5114-920         | KO_2          | M          | 106               | ko/y                 | Right              |
| 129N             | 5114-919         | WT_1          | M          | 106               | wt/y                 | Left               |
| 129C             | 5114-918         | WT_2          | M          | 106               | wt/y                 | Left               |
| 130N             | 5114-922         | KO_1          | M          | 106               | ko/y                 | Left               |
| 130C             | 5114-920         | KO_2          | M          | 106               | ko/y                 | Left               |
| 131              | 5114-878         | KO_3          | M          | 131               | ko/y                 | Left               |

**TMT\_5: *Ubqln2* KI Hippocampus:**

| <b>TMT Label</b> | <b>Animal ID</b> | <b>Sample</b> | <b>Sex</b> | <b>Age (days)</b> | <b><i>Ubqln2</i></b> | <b>Hippocampus</b> |
|------------------|------------------|---------------|------------|-------------------|----------------------|--------------------|
| 126              | 289067           | WT_1          | M          | 132               | wt                   | Left               |
| 127N             | 292049           | WT_2          | M          | 112               | wt                   | Left               |
| 127C             | 289790           | WT_3          | M          | 121               | wt                   | Left               |
| 128N             | 290262           | KI_1          | M          | 114               | P520T                | Left               |
| 128C             | 290260           | KI_2          | M          | 114               | P520T                | Left               |
| 129N             | 289067           | WT_4          | M          | 132               | wt                   | Right              |
| 129C             | 292049           | WT_5          | M          | 112               | wt                   | Right              |
| 130N             | 289790           | WT_6          | M          | 121               | wt                   | Right              |
| 130C             | 290262           | KI_3          | M          | 114               | P520T                | Right              |
| 131              | 290260           | KI_4          | M          | 114               | P520T                | Right              |

**TMT\_6: *Ubqln2* KI Spinal Cord:**

| <b>TMT Label</b> | <b>Animal ID</b> | <b>Sample</b> | <b>Sex</b> | <b>Age (days)</b> | <b><i>Ubqln2</i></b> | <b>Spinal Cord</b> |
|------------------|------------------|---------------|------------|-------------------|----------------------|--------------------|
| 126              | 289067           | WT_1          | M          | 132               | wt                   | Lumbar             |
| 127N             | 292049           | WT_2          | M          | 112               | wt                   | Lumbar             |
| 127C             | 289790           | WT_3          | M          | 121               | wt                   | Lumbar             |
| 128N             | 290262           | KI_1          | M          | 114               | P520T                | Lumbar             |
| 128C             | 290260           | KI_2          | M          | 114               | P520T                | Lumbar             |
| 129N             | 289067           | WT_4          | M          | 132               | wt                   | Cervical           |
| 129C             | 292049           | WT_5          | M          | 112               | wt                   | Cervical           |
| 130N             | 289790           | WT_6          | M          | 121               | wt                   | Cervical           |
| 130C             | 290262           | KI_3          | M          | 114               | P520T                | Cervical           |
| 131              | 290260           | KI_4          | M          | 114               | P520T                | Cervical           |

**TMT\_7\_and\_8: *Ubqln2* hTg (Hippocampus and Lumbar Spinal Cord):**

| <b>TMT label</b> | <b>Animal ID</b> | <b>Sample</b> | <b>Sex</b> | <b>Age (days)</b> | <b><i>Ubqln2</i></b> |
|------------------|------------------|---------------|------------|-------------------|----------------------|
| 126              | 1194             | WT_Tg_1       | M          | 60                | WT_hTg               |
| 127N             | 1197             | WT_Tg_2       | M          | 60                | WT_hTg               |
| 127C             | 1191             | WT_Tg_3       | F          | 60                | WT_hTg               |
| 128N             | 1178             | Mut_Tg_1      | M          | 63                | P497S_hTg            |
| 128C             | 1182             | Mut_Tg_2      | M          | 63                | P497S_hTg            |
| 129N             | 1183             | Mut_Tg_3      | M          | 63                | P497S_hTg            |
| 129C             | 1179             | WT_1          | M          | 63                | WT                   |
| 130N             | 1180             | WT_2          | M          | 63                | WT                   |
| 130C             | 1181             | WT_3          | M          | 63                | WT                   |
