# Supplementary material for: Global proteomics of Ubqln2-based murine models of ALS
Source: PubMed Central journal article supplement (PMC7873701; doi:10.1074/jbc.ra120.015960), 2020-12-10
Supplement: mmc7.pdf [file mmc7.pdf]

**Supplemental Table 1: Antibodies used in study**

| <b>Immunogen</b> | <b>Clonality</b>    | <b>Species</b> | <b>Vendor</b>                | <b>Catalog</b> | <b>Usage</b> | <b>Purpose</b> |
|------------------|---------------------|----------------|------------------------------|----------------|--------------|----------------|
| UBQLN2*          | Monoclonal 6H9      | Mouse          | Novus                        | NBP2-25164     | 1:2000       | WB             |
| UBQLN4           | Polyclonal          | Rabbit         | Genetex                      | N2-C2          | 1:1000       | WB             |
| PEG10            | Polyclonal          | Rabbit         | Proteintech                  | 14412-1-AP     | 1:1000       | WB             |
| CXX1b/RTL8       | Polyclonal          | Rabbit         | Proteintech                  | 20282-1-AP     | 1:1000       | WB             |
| TRIM32           | Polyclonal          | Rabbit         | Abcam                        | ab96612        | 1:1000       | WB             |
| Tubulin          | Monoclonal DM1A     | Mouse          | EMD Millipore                | 05-829         | 1:10,000     | WB             |
| GAPDH            | Monoclonal 6C5      | Mouse          | Abcam                        | ab8245         | 1:10,000     | WB             |
| CD68             | Monoclonal FA-11    | Rat            | AbD Serotec                  | MCA1957T       | 1:400        | IHC            |
| IBA1             | Polyclonal          | Rabbit         | Wako                         | 019-19741      | 1:15,000     | IHC            |
| ChAT             | Polyclonal          | Goat           | EMD Millipore                | AB114P         | 1:1500       | IHC            |
| GFAP             | Polyclonal          | Rabbit         | Dako                         | Z0334          | 1:200,000    | IHC            |
| Ubiquitin        | Monoclonal P4D1     | Mouse          | Santa Cruz<br>Biotechnology  | sc-8017        | 1:1000       | WB             |
| Ubiquitin        | Polyclonal          | Rabbit         | Dako                         | Z0458          | 1:60,000     | IHC            |
| 5-HT             | Polyclonal          | Rabbit         | Immunostar                   | 20080          | 1:30,000     | IHC            |
| p62              | Monoclonal<br>D6M5X | Rabbit         | Cell Signaling<br>Technology | 23214          | 1:1000       | WB             |
| HA               | Monoclonal HA-7     | Mouse          | Sigma                        | H3663          | 1:500        | WB             |
| LC3B             | Polyclonal          | Rabbit         | Novus                        | NB100-220      | 1:5,000      | WB             |
| mouse IgG        | Polyclonal          | Goat           | Licor (IR dye 680)           | 926-68070      | 1:10,000     | WB             |
| rabbit IgG       | Polyclonal          | Goat           | Licor (IR dye 800)           | 926-32211      | 1:10,000     | WB             |

\*Also recognizes UBQLN1 protein
